# Supplementary material for: Definition, Incidence, and Challenges for Assessment of Hyperprogressive Disease During Cancer Treatment With Immune Checkpoint Inhibitors: A Systematic Review and Meta-analysis
Source: PubMed Central journal article supplement (PMC7991969; doi:10.1001/jamanetworkopen.2021.1136), 2021-03-24
Supplement: jamanetwopen-e211136-s001.pdf [file jamanetwopen-e211136-s001.pdf]

## Supplementary Online Content

Park HJ, Kim KW, Won SE, et al. Definition, incidence, and challenges for assessment of hyperprogressive disease during cancer treatment with immune checkpoint inhibitors: a systematic review and meta-analysis. *JAMA Netw Open*. 2021;4(3):e211136. doi:10.1001/jamanetworkopen.2021.1136

**eTable 1.** Detailed Search Strategy

**eTable 2.** Characteristics of the Conference Abstracts (n=29)

**eTable 3.** The Newcastle-Ottawa Scale (NOS) Quality Assessment of the Enrolled Studies

**eTable 4.** Subgroup Analyses Regarding Definition of HPD and Type of Tumor

**eFigure 1.** Flow Diagram of the Conference Abstract Selection Process

**eFigure 2.** Funnel Plot Indicating Substantial Publication Bias ( $P = .003$ )

**eFigure 3.** Pooled Incidence of HPD in Studies With Newcastle-Ottawa Scale Score  $\geq 7$

This supplementary material has been provided by the authors to give readers additional information about their work.

**eTable 1. Detailed search strategy**

| Database | Search strategy                                                                                                                                                                                                                                                                                                                                                                                                                 |
|----------|---------------------------------------------------------------------------------------------------------------------------------------------------------------------------------------------------------------------------------------------------------------------------------------------------------------------------------------------------------------------------------------------------------------------------------|
| MEDLINE  | (checkpoint OR 'check point' OR check OR 'immunotherapy'/exp OR immunotherapy OR 'pd 1'/exp OR 'pd 1' OR 'pd 11' OR 'ctla 4'/exp OR 'ctla 4' OR 'ipilimumab'/exp OR ipilimumab OR 'nivolumab'/exp OR nivolumab OR 'pembrolizumab'/exp OR pembrolizumab OR 'atezolizumab'/exp OR atezolizumab OR 'avelumab'/exp OR avelumab OR 'durvalumab'/exp OR durvalumab) AND hyperprogress* AND [1-1-0001]/sd NOT [3-3-2020]/sd            |
| EMBASE   | ("checkpoint"[Text Word] OR "check-point"[Text Word] OR "check"[Text Word] OR "immunotherapy"[Text Word] OR ("PD-1"[Text Word] OR "PD-L1"[Text Word] OR "CTLA-4"[Text Word] OR "ipilimumab"[Text Word] OR "nivolumab"[Text Word] OR "pembrolizumab"[Text Word] OR "atezolizumab"[Text Word] OR "avelumab"[Text Word] OR "durvalumab"[Text Word])) AND "hyperprogress*"[Text Word] AND 0001/01/01:2020/03/03[Date - Publication] |

**eTable 2. Characteristics of the conference abstracts (n=29)**

| Study                          | Study design                                  | Tumor                               | Agent(s)                                                    | No. of previous treatment lines | HPD definition                                                                                                                                                                | No. of patients | Incidence of HPD | Pre-treatment period | Post-treatment period | Prognostic impact of HPD                                                      |                       |
|--------------------------------|-----------------------------------------------|-------------------------------------|-------------------------------------------------------------|---------------------------------|-------------------------------------------------------------------------------------------------------------------------------------------------------------------------------|-----------------|------------------|----------------------|-----------------------|-------------------------------------------------------------------------------|-----------------------|
|                                |                                               |                                     |                                                             |                                 |                                                                                                                                                                               |                 |                  |                      |                       | HPD vs non-HPD                                                                | HPD vs PD without HPD |
| Alfieri S et al (2019)         | Retrospective study                           | SqCC of head and neck               | ICI <sup>a</sup>                                            | ≥2 (75%)                        | PD by RECIST 1.1 at first evaluation and $TGK_{post}/TGK_{pre} \geq 2$                                                                                                        | 88              | 8.0% (7/88)      | NA                   | NA                    | OS, 3.7 vs 8.3 months ( $P = 0.348$ ), PFS, 1.8 vs 3.5 months ( $P = 0.001$ ) | NA                    |
| Ayala De Miguel P et al (2019) | Retrospective study                           | NSCLC                               | ICI monotherapy <sup>a</sup>                                | 0 (18%), ≥1 (82%)               | PD by RECIST 1.1 at first evaluation and $\Delta TGR > 50\%$ per month                                                                                                        | 66              | 10.6% (7/66)     | NA                   | < 2 months            | OS, HR, 4.35; (43.6 vs 11.3 months) ( $P = 0.0037$ )                          | NA                    |
| Colle E et al (2019)           | Retrospective study                           | Melanoma                            | PD-1 inhibitor monotherapy                                  | 0 (47%)                         | progression/death within 3 months with normal initial LDH and ECOG at baseline, and either ECOG increased from 0 to 3-4, either LDH increased from normal to elevated or both | 793             | 10.3% (82/793)   | NA                   | NA                    | NA                                                                            | NA                    |
| Economopoulou P et al (2019)   | Retrospective study                           | SqCC of head and neck               | PD-1 or PD-L1 inhibitor monotherapy                         | NA                              | Radiological HPD ( $TGKR \geq 2$ ) or Clinical HPD (Disease-related rapid clinical deterioration post IO)                                                                     | 62              | 25.8% (16/62)    | NA                   | 3 months              | NA                                                                            | NA                    |
| Farè E et al (2018)            | Retrospective study                           | Miscellaneous advanced solid tumors | PD-1 inhibitor monotherapy or combined with PD-L1 inhibitor | NA                              | PD by RECIST 1.1 at first evaluation and $TGR_{POST}/TGR_{PRE} \geq 2$                                                                                                        | 197             | 3.6% (7/197)     | 2 weeks to 3 months  | NA                    | NA                                                                            | NA                    |
| Feng Y et al (2018)            | Retrospective analysis of clinical trial data | AGC                                 | Nivolumab                                                   | ≥2                              | Definition 1: An increase of ≥20% in the sum of longest diameter (SLD) of target lesions at 8 weeks post baseline                                                             | 243             | 27.6%            | NA                   | 8 weeks               | NA                                                                            | NA                    |
|                                |                                               |                                     |                                                             |                                 | Definition 2: An increase of ≥50% in the sum of longest diameter (SLD) of target lesions at 8 weeks post baseline                                                             | 243             | 5.4%             | NA                   | 8 weeks               | NA                                                                            | NA                    |
|                                |                                               |                                     |                                                             |                                 | Definition 3: An increase of                                                                                                                                                  | 243             | 1.2%             | NA                   | 8 weeks               | NA                                                                            | NA                    |

|                           |                                               |                                  |                                                                        |           |                                                                                                                                                                     |     |                |    |    |                                                                                                        |    |
|---------------------------|-----------------------------------------------|----------------------------------|------------------------------------------------------------------------|-----------|---------------------------------------------------------------------------------------------------------------------------------------------------------------------|-----|----------------|----|----|--------------------------------------------------------------------------------------------------------|----|
|                           |                                               |                                  |                                                                        |           | ≥100% in the sum of longest diameter (SLD) of target lesions at 8 weeks post baseline                                                                               |     |                |    |    |                                                                                                        |    |
| Freixinos VR et al (2018) | Retrospective analysis of clinical trial data | Gynecologic cancers <sup>b</sup> | ICI <sup>a</sup>                                                       | 0-8       | ≥40% tumor burden increase or ≥20% plus multiple new lesions                                                                                                        | 60  | 23%            | NA | NA | NA                                                                                                     | NA |
| Gandara DR et al (2018)   | Retrospective analysis of clinical trial data | NSCLC                            | Atezolizumab                                                           | ≥ 1       | ≥ 50% increase in the SLD (per investigator) from baseline to first assessment (6 weeks) or death due to PD per investigator within 12 weeks without a post-tx scan | 425 | 10.4% (44/425) | NA | NA | NA                                                                                                     | NA |
| Ghiglione L et al (2019)  | Retrospective study                           | Various <sup>c</sup>             | ICI (mono or dual therapy) or combined with chemotherapy <sup>a</sup>  | ≥ 2 (24%) | TGR <sub>POST</sub> /TGR <sub>PRE</sub> ≥ 2                                                                                                                         | 187 | 9.6% (18/187)  | NA | NA | OS, HR, 2.11; 4.65 vs. 11.3 months ( <i>P</i> < 0.005)<br>PFS, 2.25 vs 3.97 months ( <i>P</i> < 0.001) | NA |
| Giusti R et al (2019)     | Retrospective study                           | NSCLC                            | PD-1 inhibitor monotherapy                                             | 0         | TTF < 2 months, > 50% increase in tumor burden compared with pre-immunotherapy imaging                                                                              | 20  | 25% (5/20)     | NA | NA | NA                                                                                                     | NA |
| Gomez LG et al (2019)     | Retrospective study                           | NSCLC                            | PD-1 inhibitor monotherapy                                             | NA        | TGK <sub>pos</sub> /TGK <sub>pre</sub> ≥ 2                                                                                                                          | 42  | 14%            | NA | NA | NA                                                                                                     | NA |
| Han J et al (2019)        | Retrospective study                           | NSCLC                            | ICI <sup>a</sup>                                                       | NA        | ΔTGR > 50%                                                                                                                                                          | 51  | 11.8% (6/51)   | NA | NA | NA                                                                                                     | NA |
| Honjo O et al (2018)      | Retrospective study                           | Lung cancer                      | PD-1 inhibitor monotherapy                                             | NA        | PD by RECIST 1.1 at first evaluation and TGR <sub>POST</sub> /TGR <sub>PRE</sub> ≥ 2                                                                                | 216 | 3.2% (7/216)   | NA | NA | OS, 175 days (IQR, 54-618) and 141 days (IQR, 22-635)                                                  | NA |
| Kanjanapan Y et al (2018) | Retrospective analysis of clinical trial data | Various <sup>d</sup>             | ICI monotherapy or combined with co-stimulatory molecules <sup>a</sup> | 0-7       | PD by RECIST 1.1 at first evaluation and TGR <sub>POST</sub> /TGR <sub>PRE</sub> ≥ 2                                                                                | 182 | 7.1% (13/182)  | NA | NA | OS, HR, 0.75 (non-HPD as reference, <i>P</i> = 0.5)                                                    | NA |

|                         |                     |       |                                               |          |                                                                                                                                                                                                                                                                                                                                                                                               |     |                |    |         |                                           |                                                                                       |
|-------------------------|---------------------|-------|-----------------------------------------------|----------|-----------------------------------------------------------------------------------------------------------------------------------------------------------------------------------------------------------------------------------------------------------------------------------------------------------------------------------------------------------------------------------------------|-----|----------------|----|---------|-------------------------------------------|---------------------------------------------------------------------------------------|
| Kim J et al (2019)      | Retrospective study | NSCLC | ICI <sup>a</sup>                              | NA       | TGK <sub>post</sub> /TGK <sub>pre</sub> ≥ 2 and TTF < 2 months                                                                                                                                                                                                                                                                                                                                | 231 | 10.8% (25/231) | NA | NA      | OS, 5.6 vs 7.4 months ( <i>P</i> < 0.001) | NA                                                                                    |
| Lee JC et al (2019)     | Retrospective study | NSCLC | PD-1 inhibitor monotherapy                    | 1 (100%) | PD by RECIST 1.1 at first evaluation and TGR <sub>POST</sub> /TGR <sub>PRE</sub> ≥ 2                                                                                                                                                                                                                                                                                                          | 83  | 19.3% (16/83)  | NA | NA      | NA                                        | OS, 2.2 months (95% CI, 0.92 to 3.75) vs 4.1 months (95% CI, 1.54 to 6.67)            |
| Lo Russo G et al (2019) | Retrospective study | NSCLC | ICI <sup>a</sup>                              | NA       | Fulfilling 3 or more of the followings: (1) TTF < 2 months, (2) ≥ 50% increase of tumor burden between baseline and first evaluation, (3) ≥ 2 new lesions in an organ already involved between baseline and first evaluation, (4) disease spread to a new organ between baseline and first evaluation, and (5) decrease in ECOG performance status ≥ 2 during the first 2 months of treatment | 257 | 20.6% (53/257) | NA | 8 weeks | NA                                        | OS, HR, 2.481 ( <i>P</i> < 0.0001), PFS, HR, 2.448 ( <i>P</i> < 0.0001)               |
| Park C et al (2019)     | Retrospective study | NSCLC | PD-1 inhibitor or PD-L1 inhibitor monotherapy | 1 (100%) | Definition 1: TGR <sub>POST</sub> /TGR <sub>PRE</sub> > 2                                                                                                                                                                                                                                                                                                                                     | 73  | 12.3% (9/73)   | NA | NA      | NA                                        | OS, 2.4 vs 5.2 months ( <i>P</i> = 0.002), PFS, 1.6 vs 2.1 months ( <i>P</i> < 0.001) |
|                         |                     |       |                                               |          | Definition 2: TGK <sub>post</sub> /TGK <sub>pre</sub> ≥ 2                                                                                                                                                                                                                                                                                                                                     | 73  | 15.1% (11/73)  |    | NA      | NA                                        | OS, 2.4 vs 5.2 months ( <i>P</i> = 0.002), PFS, 1.6 vs 2.1 months ( <i>P</i> < 0.001) |
|                         |                     |       |                                               |          | Definition 3: ΔTGR > 50%                                                                                                                                                                                                                                                                                                                                                                      | 73  | 0% (0/73)      |    | NA      | NA                                        | NA                                                                                    |
| Patil P et al (2018)    | Retrospective study | NSCLC | PD-1 inhibitor or PD-L1 inhibitor monotherapy | NA       | TGK <sub>POST</sub> /TGK <sub>PRE</sub> ≥ 2                                                                                                                                                                                                                                                                                                                                                   | 336 | 8.3% (28/336)  | NA | NA      | NA                                        | NA                                                                                    |
| Perna M et al           | Retrospective study | NSCLC | PD-1 inhibitor monotherapy                    | ≥ 1      | > 50% increase in tumor burden compared with pre-                                                                                                                                                                                                                                                                                                                                             | 46  | 2.2% (1/46)    | NA | NA      | NA                                        | NA                                                                                    |

|                                 |                                               |                               |                                                                       |           |                                                                                                                                                                                                                                                                                                 |     |                |    |         |                                                      |                                                                                                           |
|---------------------------------|-----------------------------------------------|-------------------------------|-----------------------------------------------------------------------|-----------|-------------------------------------------------------------------------------------------------------------------------------------------------------------------------------------------------------------------------------------------------------------------------------------------------|-----|----------------|----|---------|------------------------------------------------------|-----------------------------------------------------------------------------------------------------------|
| (2018)                          |                                               |                               |                                                                       |           | immunotherapy imaging                                                                                                                                                                                                                                                                           |     |                |    |         |                                                      |                                                                                                           |
| Simões Da Rocha PF et al (2018) | Retrospective study                           | NSCLC                         | PD-1 inhibitor monotherapy                                            | NA        | TGR <sub>POST</sub> /TGR <sub>PRE</sub> ≥ 2                                                                                                                                                                                                                                                     | 40  | 30% (12/40)    | NA | NA      | NA                                                   | NA                                                                                                        |
| Suarez C et al (2019)           | Retrospective analysis of clinical trial data | Urothelial carcinoma, RCC     | ICI monotherapy or combination <sup>a</sup>                           | ≥ 1 (53%) | PD by RECIST at first 8 weeks after treatment initiation and minimum increase in the measurable lesions of 10 mm plus: (1) 40% increase in STL compared with baseline and/or (2) 20% increase in STL compared with baseline plus the appearance of new lesions in at least two different organs | 88  | 10.2% (9/88)   | NA | NA      | OS, 8.87 vs 4.77 months ( <i>P</i> = 0.065)          | NA                                                                                                        |
| Sugimoto N et al (2018)         | Retrospective study                           | AGC                           | PD-1 inhibitor monotherapy                                            | NA        | TGK <sub>POST</sub> /TGK <sub>PRE</sub> ≥ 2                                                                                                                                                                                                                                                     | 9   | 55.6% (5/9)    | NA | NA      | NA                                                   | NA                                                                                                        |
| Sunakawa Y et al (2019)         | clinical trial (inter-rim analysis)           | AGC                           | PD-1 inhibitor monotherapy                                            | NA        | TGR <sub>POST</sub> /TGR <sub>PRE</sub> ≥ 2                                                                                                                                                                                                                                                     | 105 | 24.8% (26/105) | NA | NA      | NA                                                   | NA                                                                                                        |
| Suzuki T et al (2020)           | Retrospective study                           | AGC                           | PD-1 inhibitor monotherapy                                            | NA        | TGR <sub>POST</sub> /TGR <sub>PRE</sub> ≥ 2                                                                                                                                                                                                                                                     | 218 | 17.4% (38/218) | NA | NA      | NA                                                   | OS, HR, 1.0; 5.0 vs 4.6 months ( <i>p</i> = 0.8695), PFS, HR, 1.3; 1.5 vs 1.6 months ( <i>P</i> = 0.1194) |
| Takahashi R et al (2019)        | Retrospective study                           | NSCLC                         | PD-1 or PD-L1 inhibitor monotherapy                                   | NA        | TTF < 1 month and TGK <sub>pos</sub> /TGK <sub>pre</sub> ≥ 2                                                                                                                                                                                                                                    | 94  | 4.3% (4/94)    | NA | 1 month | NA                                                   | NA                                                                                                        |
| Tan TJY et al (2019)            | Retrospective analysis of clinical trial data | Triple-negative breast cancer | IO monotherapy/combination or combined with chemotherapy <sup>a</sup> | 0-8       | TGR <sub>POST</sub> /TGR <sub>PRE</sub> ≥ 2                                                                                                                                                                                                                                                     | 40  | 10% (4/40)     | NA | NA      | OS, HR, 0.89 (non-HPD as reference, <i>P</i> = 0.41) | NA                                                                                                        |
| Tang B et al (2019)             | Retrospective analysis of                     | Melanoma                      | PD-1 inhibitor monotherapy                                            | NA        | PD by RECIST 1.1 at first evaluation and                                                                                                                                                                                                                                                        | 90  | 5.6% (5/90)    | NA | NA      | NA                                                   | NA                                                                                                        |

|                                                                                                                                                                                                                                                                                                                                                                                                                                                                                                                                                                                                                                                                                                                                                                                                                                                                                                                                                                                                                                    | clinical trial data |                                |                                                      |     | TGR <sub>POST</sub> /TGR <sub>PRE</sub> ≥ 2                                          |     |               |    |    |    |                                  |
|------------------------------------------------------------------------------------------------------------------------------------------------------------------------------------------------------------------------------------------------------------------------------------------------------------------------------------------------------------------------------------------------------------------------------------------------------------------------------------------------------------------------------------------------------------------------------------------------------------------------------------------------------------------------------------------------------------------------------------------------------------------------------------------------------------------------------------------------------------------------------------------------------------------------------------------------------------------------------------------------------------------------------------|---------------------|--------------------------------|------------------------------------------------------|-----|--------------------------------------------------------------------------------------|-----|---------------|----|----|----|----------------------------------|
| Zalcman G et al (2019)                                                                                                                                                                                                                                                                                                                                                                                                                                                                                                                                                                                                                                                                                                                                                                                                                                                                                                                                                                                                             | clinical trial      | Malignant pleural mesothelioma | PD-1 inhibitor mono or combined with PD-L1 inhibitor | 1-2 | PD by RECIST 1.1 at first evaluation and TGR <sub>POST</sub> /TGR <sub>PRE</sub> ≥ 2 | 187 | 5.9% (11/187) | NA | NA | NA | OS, HR, 0.37 ( <i>P</i> = 0.006) |
| <p>Abbreviations: AGC, advanced gastric cancer; ECOG, Eastern Cooperative Oncology Group; HPD, hyperprogressive disease; HR, hazard ratio; IO, immunotherapy; IQR, interquartile range; NA, not available; NSCLC, non-small cell lung cancer; OS, overall survival; PD, progressive disease; PFS, progression-free survival; POST, post-treatment assessment period; PRE, pre-treatment assessment period; RCC, renal cell carcinoma; SqCC, squamous cell carcinoma; STL, sum of target lesions; TGK, tumor growth kinetics; TGR, tumor growth ratio</p> <p><sup>a</sup> Details of the used agent(s) were not provided.</p> <p><sup>b</sup> Ovarian cancer (n=32), endometrial cancer (n=8), cervical cancer (n=15) and vulvar cancer (n=5)</p> <p><sup>c</sup> NSCLC (62%), urothelial carcinoma (23%) and kidney carcinoma (15%)</p> <p><sup>d</sup> Head and neck (18%), gynecological (16%), lung (15%), gastrointestinal (15%), genitourinary (12%), melanoma (8%), sarcoma (7%), endocrine (5%) and breast (4%) cancers</p> |                     |                                |                                                      |     |                                                                                      |     |               |    |    |    |                                  |

**eTable 3. The Newcastle-Ottawa scale (NOS) quality assessment of the enrolled studies**

| Study                              | Selection of cohorts                                  |                                     |                           |                                                                                       | Comparability of cohorts                                                     | Outcome                  |                                 |                                               |
|------------------------------------|-------------------------------------------------------|-------------------------------------|---------------------------|---------------------------------------------------------------------------------------|------------------------------------------------------------------------------|--------------------------|---------------------------------|-----------------------------------------------|
|                                    | Representativeness of the exposed cohort <sup>a</sup> | Selection of the non-exposed cohort | Ascertainment of exposure | Demonstration that outcome of interest was not present at start of study <sup>b</sup> | Comparability of cohorts on the basis of the design or analysis <sup>c</sup> | Ascertainment of outcome | Adequate follow-up <sup>d</sup> | Adequacy of follow-up of cohorts <sup>e</sup> |
| Champiat S <i>et al</i> (2017)     | ☆                                                     | ☆                                   | ☆                         |                                                                                       | ☆☆                                                                           | ☆                        | ☆                               | ☆                                             |
| Kato S <i>et al</i> (2017)         | ☆                                                     | ☆                                   | ☆                         |                                                                                       | ☆☆                                                                           | ☆                        |                                 |                                               |
| Saada-Bouzid E <i>et al</i> (2017) | ☆                                                     | ☆                                   | ☆                         |                                                                                       | ☆☆                                                                           | ☆                        | ☆                               | ☆                                             |
| Ferrara R <i>et al</i> (2018)      | ☆                                                     | ☆                                   | ☆                         |                                                                                       | ☆☆                                                                           | ☆                        | ☆                               | ☆                                             |
| Abbas W <i>et al</i> (2019)        | ☆                                                     | ☆                                   | ☆                         |                                                                                       |                                                                              | ☆                        |                                 |                                               |
| Aoki M <i>et al</i> (2019)         | ☆                                                     | ☆                                   | ☆                         |                                                                                       | ☆☆                                                                           | ☆                        | ☆                               | ☆                                             |
| Hwang I <i>et al</i> (2019)        | ☆                                                     | ☆                                   | ☆                         |                                                                                       | ☆☆                                                                           | ☆                        | ☆                               | ☆                                             |
| Ji Z <i>et al</i> (2019)           | ☆                                                     | ☆                                   | ☆                         |                                                                                       | ☆☆                                                                           | ☆                        |                                 |                                               |
| Kamada T <i>et al</i> (2019)       | ☆                                                     | ☆                                   | ☆                         |                                                                                       |                                                                              | ☆                        |                                 |                                               |
| Kanjanapan Y <i>et al</i> (2019)   | ☆                                                     | ☆                                   | ☆                         |                                                                                       | ☆☆                                                                           | ☆                        | ☆                               | ☆                                             |
| Kim CG <i>et al</i> (2019)         | ☆                                                     | ☆                                   | ☆                         |                                                                                       | ☆☆                                                                           | ☆                        | ☆                               | ☆                                             |
| Kim Y <i>et al</i> (2019)          | ☆                                                     | ☆                                   | ☆                         |                                                                                       | ☆☆                                                                           | ☆                        | ☆                               | ☆                                             |
| Lo Russo G <i>et al</i> (2019)     | ☆                                                     | ☆                                   | ☆                         |                                                                                       | ☆☆                                                                           | ☆                        | ☆                               | ☆                                             |
| Lu Z <i>et al</i> (2019)           | ☆                                                     | ☆                                   | ☆                         | ☆                                                                                     | ☆☆                                                                           | ☆                        | ☆                               | ☆                                             |
| Matos I <i>et al</i> (2019)        | ☆                                                     | ☆                                   | ☆                         |                                                                                       | ☆☆                                                                           | ☆                        | ☆                               | ☆                                             |
| Sasaki A <i>et al</i> (2019)       | ☆                                                     | ☆                                   | ☆                         |                                                                                       | ☆☆                                                                           | ☆                        | ☆                               | ☆                                             |
| Scheiner B <i>et al</i> (2019)     | ☆                                                     | ☆                                   | ☆                         |                                                                                       |                                                                              | ☆                        | ☆                               | ☆                                             |
| Ten Berge D <i>et al</i> (2019)    | ☆                                                     | ☆                                   | ☆                         |                                                                                       |                                                                              | ☆                        | ☆                               | ☆                                             |
| Tunali I <i>et al</i> (2019)       | ☆                                                     | ☆                                   | ☆                         |                                                                                       |                                                                              | ☆                        | ☆                               | ☆                                             |



|                                                                                                                                                                                                                                                                                                                                                                                                                                                                                                                                                                                                                                                                                                                                                                                                                                                                                                                                                                                                                                                                                                                                                                                                                                                                    |   |   |   |   |    |   |   |   |
|--------------------------------------------------------------------------------------------------------------------------------------------------------------------------------------------------------------------------------------------------------------------------------------------------------------------------------------------------------------------------------------------------------------------------------------------------------------------------------------------------------------------------------------------------------------------------------------------------------------------------------------------------------------------------------------------------------------------------------------------------------------------------------------------------------------------------------------------------------------------------------------------------------------------------------------------------------------------------------------------------------------------------------------------------------------------------------------------------------------------------------------------------------------------------------------------------------------------------------------------------------------------|---|---|---|---|----|---|---|---|
| Arasanz H <i>et al</i> (2020)                                                                                                                                                                                                                                                                                                                                                                                                                                                                                                                                                                                                                                                                                                                                                                                                                                                                                                                                                                                                                                                                                                                                                                                                                                      | ☆ | ☆ | ☆ | ☆ | ☆  | ☆ | ☆ | ☆ |
| Forschner A <i>et al</i> (2020)                                                                                                                                                                                                                                                                                                                                                                                                                                                                                                                                                                                                                                                                                                                                                                                                                                                                                                                                                                                                                                                                                                                                                                                                                                    | ☆ | ☆ | ☆ |   | ☆☆ | ☆ | ☆ | ☆ |
| Petrioli R <i>et al</i> (2020)                                                                                                                                                                                                                                                                                                                                                                                                                                                                                                                                                                                                                                                                                                                                                                                                                                                                                                                                                                                                                                                                                                                                                                                                                                     | ☆ | ☆ | ☆ |   |    | ☆ |   |   |
| Refae S <i>et al</i> (2020)                                                                                                                                                                                                                                                                                                                                                                                                                                                                                                                                                                                                                                                                                                                                                                                                                                                                                                                                                                                                                                                                                                                                                                                                                                        | ☆ | ☆ | ☆ |   | ☆☆ | ☆ | ☆ | ☆ |
| Ruiz-Patino A <i>et al</i> (2020)                                                                                                                                                                                                                                                                                                                                                                                                                                                                                                                                                                                                                                                                                                                                                                                                                                                                                                                                                                                                                                                                                                                                                                                                                                  | ☆ | ☆ | ☆ |   | ☆  | ☆ |   |   |
| <p>Each study could be awarded a maximum of nine stars: a maximum of two stars for the item regarding comparability and a maximum of one star for other 7 items.</p> <p><sup>a</sup> Exposure was the occurrence of hyperprogressive disease. All included studies were awarded one star because patients with hyperprogression were truly or somewhat representative and not selected from general population with hyperprogression.</p> <p><sup>b</sup> One star was awarded if a study was a prospective cohort study.</p> <p><sup>c</sup> A maximum of two stars could be awarded for this item. If a study adjusted for baseline demographic factors (e.g., age, gender), one star was awarded, and if a study adjusted for additional confounding factors (e.g., ECOG status, Royal Marsden Hospital score, histology, number of metastasis site, drug type, other laboratory data, etc.), an additional star was awarded.</p> <p><sup>d</sup> For studies reporting OS or PFS, with comparison between hyperprogressors and non-hyperprogressors or between hyperprogressors and progressors without hyperprogression, one star was awarded.</p> <p><sup>e</sup> If a study reported a follow up rate of <math>\geq 80\%</math>, one score was awarded.</p> |   |   |   |   |    |   |   |   |

**eTable 4. Subgroup analyses regarding definition of HPD and type of tumor.**

| Factor                                   | Pooled incidence of HPD (%) | P value       |               |               |               |
|------------------------------------------|-----------------------------|---------------|---------------|---------------|---------------|
|                                          |                             | vs Category 1 | vs Category 2 | vs Category 3 | vs Category 4 |
| <b>HPD definition</b>                    |                             |               |               |               |               |
| Category 1 (TGR ratio)                   | 9.4 (6.9–12.0)              | -             | 0.556         | 0.064         | 0.883         |
| Category 2 (TGK ratio)                   | 15.8 (8.0–23.7)             | 0.556         | -             | 0.918         | 0.896         |
| Category 3 (early tumor burden increase) | 20.6 (9.3–31.8)             | 0.064         | 0.918         | -             | 0.370         |
| Category 4 (combination)                 | 12.1 (7.3–17.5)             | 0.883         | 0.896         | 0.370         | -             |
| <b>Type of tumor</b>                     |                             | 0.441         |               |               |               |
| NSCLC                                    | 15.0 (10.5–19.5)            |               |               |               |               |
| AGC                                      | 19.4 (9.7–29.1)             |               |               |               |               |

Abbreviation: AGC, advanced gastric cancer; HPD, hyperprogressive disease; NSCLC, non-small cell lung cancer, TGK, tumor growth kinetics; TGR, tumor growth ratio.

**eFigure 1. Flow diagram of the conference abstract selection process**

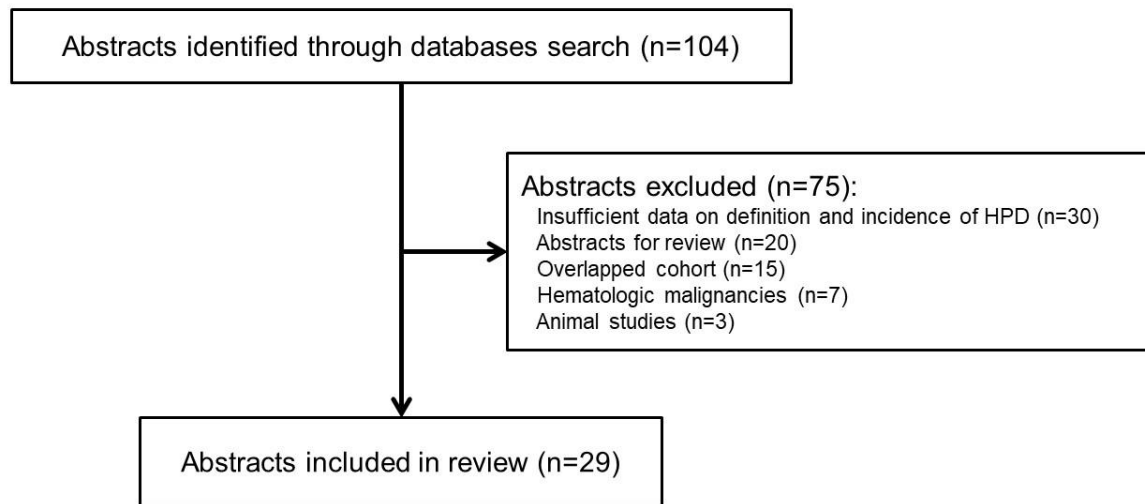

**eFigure 2. Funnel plot indicating substantial publication bias ( $P = .003$ )**

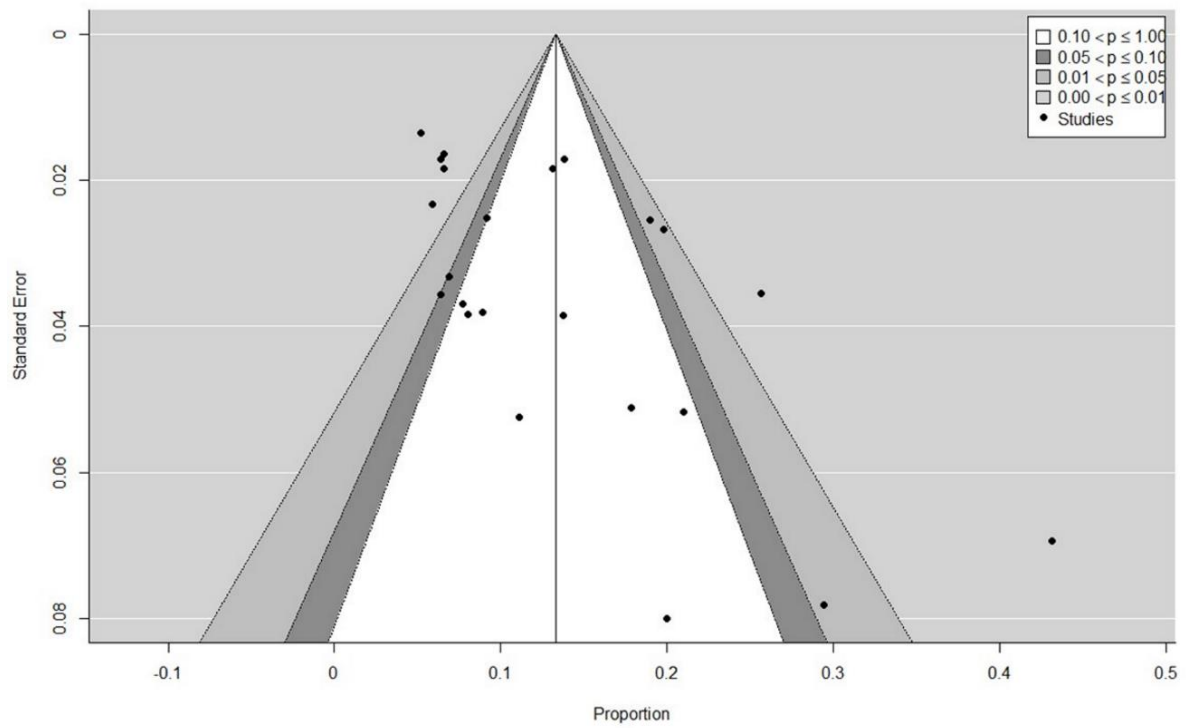

**eFigure 3. Pooled incidence of HPD in studies with Newcastle-Ottawa Scale score  $\geq 7$**

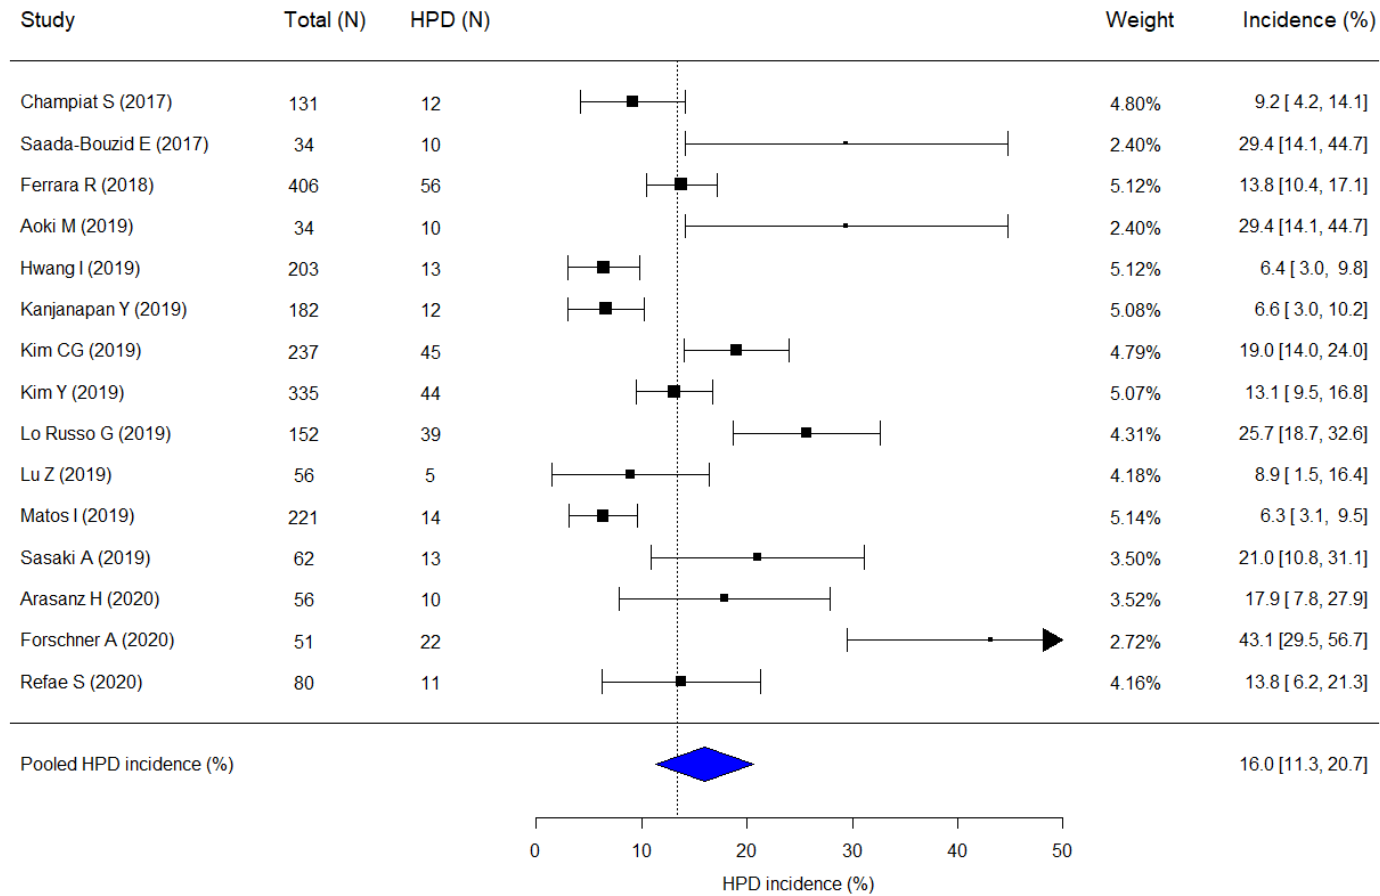

Fifteen studies out of 24 included studies (62.5%) were awarded equal or higher than 7 scores using the Newcastle-Ottawa Scale. The pooled incidence of HPD from the 15 studies was 16.0% (95% CI, 11.3–20.7%).
